# Supplementary material for: Sfp1 regulates transcriptional networks driving cell growth and division through multiple promoter-binding modes
Source: PubMed Central journal article supplement — Genes Dev. 2019 Mar 1;33(5-6):288–93. doi: 10.1101/gad.322040.118 (PMC6411004; doi:10.1101/gad.322040.118), 2019-03-01
Supplement: supp_gad.322040.118_Supplemental_Figure_2.pdf [file supp_gad.322040.118_Supplemental_Figure_2.pdf]

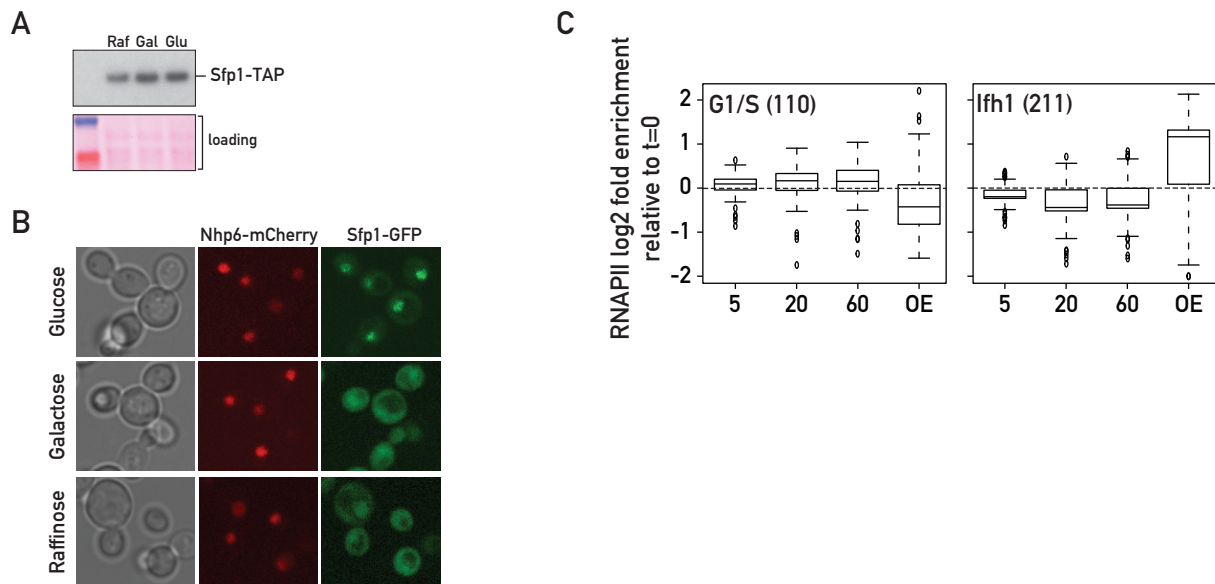

**Figure S2.** (A) Sfp1-TAP was detected by western blot using a TAP antibody. Whole-cell extracts were prepared from a strain expressing Sfp1-TAP from the endogenous *SFP1* locus, grown in either raffinose (raf), galactose (gal) or glucose (glu) medium. Proteins were separated by SDS-PAGE before western blotting and antibody staining (top panel). Ponceau red stain served as a loading control (bottom panel). (B) Cells expressing Sfp1-GFP and Nhp6-mCherry were grown in glucose, galactose or raffinose medium, as indicated, and visualized by spinning-disc confocal microscopy (see Supplemental Methods). (C) Box plots showing RNAPII ChIP-seq fold-change ( $\log_2$ ) at genes where Sfp1 promoter binding is detected by ChIP-seq. Changes are shown for the indicated times (min) following rapamycin treatment of a Sfp1 anchor-away strain (5, 20 or 60), or following 1 hr growth in galactose (2%) in a *pGAL1-SFP1* strain (OE). Genes where Sfp1 promoter binding is strongly glucose-dependent (110 total, “G1/S”) are shown on the left panel; all others (211 total, “Ifh1”) are shown in the right panel.)
